# Supplementary material
Source: PubMed Central journal article supplement (PMC6746436)
Supplement: supp_RA119.008903_144936_1_supp_354110_pv2mgv.pdf [file supp_RA119.008903_144936_1_supp_354110_pv2mgv.pdf]

## Supporting Information

### Magnesium transporter 1 (MAGT1) deficiency causes selective defects in N-linked glycosylation and expression of immune-response genes

Mami Matsuda-Lennikov<sup>1,2 #†</sup>, Matthew Biancalana<sup>1,2 #‡</sup>, Juan Zou<sup>1,2</sup>, Juan C. Ravell<sup>1,2</sup>, Lixin Zheng<sup>1,2</sup>, Chrysi Kanellopoulou<sup>1,2</sup>, Ping Jiang<sup>1,2</sup>, Giulia Notarangelo<sup>1,2 ††</sup>, Huie Jing<sup>2,3</sup>, Evan Masutani<sup>1,2 †††</sup>, Andrew J. Oler<sup>4</sup>, Lisa Renee Olano<sup>5</sup>, Benjamin L. Schulz<sup>6</sup>, and Michael J. Lenardo<sup>1,2 \*</sup>

<sup>1</sup> Molecular Development of the Immune System Section, Laboratory of Immune System Biology, National Institute of Allergy and Infectious Diseases, National Institutes of Health, Bethesda, MD 20892. <sup>2</sup> Clinical Genomics Program, National Institute of Allergy and Infectious Diseases, National Institutes of Health, Bethesda, MD 20892. <sup>3</sup> Human Immunological Diseases Section, Laboratory of Clinical Immunology and Microbiology, National Institute of Allergy and Infectious Diseases, National Institutes of Health, Bethesda, MD 20892. <sup>4</sup> Bioinformatics and Computational Biosciences Branch, Office of Cyber Infrastructure and Computational Biology, National Institute of Allergy and Infectious Diseases, National Institutes of Health, Bethesda, MD 20892. <sup>5</sup> Laboratory of Neurotoxicology, National Institutes of Mental Health / National Institutes of Health, Bethesda, MD 20892. <sup>6</sup> The University of Queensland, Brisbane St Lucia, QLD 4072.

**Running title:** MAGT1 deficiency causes selective N-linked glycosylation defect

# co-first authors

\* To whom correspondence should be addressed. E-mail: [mjlenardo@niaid.nih.gov](mailto:mjlenardo@niaid.nih.gov)

† Present address: Weizmann Institute of Science, Rehovot 7610001, Israel

‡ Present address: New York University Langone Medical Center, New York, NY 10016

†† Present address: Harvard Medical School, Department of Cell Biology, Boston, MA 02115

††† Present address: University of California, San Diego, School of Medicine, Medical Scientist Training Program, San Diego, CA 92093

**Signal peptide**

**Thioredoxin**

|                |                                                 |                     |    |
|----------------|-------------------------------------------------|---------------------|----|
| H_sapiens      | MAARWRFWCVSVTMVVA--LLIVCDVP--SASAQRKKEMVLSEKVSQ | LMEWNTN             | 57 |
| P_troglodytes  | MAARWRFWCVSVTMAVA--LLIVCDVP--SASAQRKKEMVLSEKVSQ | LM                  | 57 |
| M_musculus     | MASPRWFWSVCAIAAVA--LLLVSQV--SASAQRKKEMVLSEKVSQ  | LMEWA               | 57 |
| R_norvegicus   | MASPRWLWCVCATAAVT--LLLVSQV--SASAQRKKEKVLVEKVIQ  | LME                 | 57 |
| C_familiaris   | MAARWWLWCVSANMAVA--LLLSYGVP--SASAQRKKEMVLSEKVSQ | LME                 | 57 |
| B_taurus       | MAARWWRWCVCAIMAVA--LLLVSQV--SASAQRKKEMVLSEKVSQ  | LMEWNTN             | 57 |
| G_gallus       | -----MAALPVLVLV--LLLACGGP--RAAGQKRKEMVLSEKVSQ   | LMEWTSK             | 50 |
| X_laevis       | -----MAGLKGLLFGG--ILFAMCGG--LSEGOKKKEMVLSDKVGQ  | LMDWASK             | 51 |
| D_rerio        | -----MLHKLLIVVFLVVLHDM--RLNGQKKKETLLSEKVSQ      | MMEWVSKR            | 50 |
| D_melanogaster | -----MRL LHKTLLSGLLVVALFAIYAAAQS                | KSKTGLSLSEKVQNL     | 54 |
| C_elegans      | -----MRTM--VLLFFMLLAVYE----                     | SAQQQTLEDKVQNLVDLTS | 43 |

...

**Thioredoxin**

|                |                                  |                  |              |     |
|----------------|----------------------------------|------------------|--------------|-----|
| H_sapiens      | GDKFRRLVKAPPRNYSVIVMFTALQLHRCVVC | KQADEEFQILANSWR  | YSSA         | 115 |
| P_troglodytes  | GDKFRRLVKAPPRNYSVIVMFTALQLHRCVVC | KQADEEFQILANSWR  |              | 115 |
| M_musculus     | GDKFRRLVKAPPRNYSVIVMFTALQLHRCVVC | KQADEEFQILANSWR  | YSN          | 115 |
| R_norvegicus   | GDKFRPLVKAPPRNYSVIVMFTALQLHRCVVC | KQADEEFQILANFWRY |              | 115 |
| C_familiaris   | GDKFRRLVKAPPRNYSVIVMFTALQLHRCVVC | KQADEEFQILANSWR  |              | 115 |
| B_taurus       | GDKFRRLVKAPPRNYSVIVMFTALQLHRCVVC | KQADEEFQILANSWR  | YSSAF        | 115 |
| G_gallus       | GDKFRRLVKAPPRNYSVIVMFTALQPHRCVVC | KQADEEYQVLANSWR  | YSSAF        | 108 |
| X_laevis       | GDKFRRFIKSPPRNYSVIVMFTALQAHRCVVC | KQADEEYQILANSWR  | YSSAF        | 109 |
| D_rerio        | GEKFKRLVRAHPRNYSVIVMFTALQPORCGVC | RQADEEYQILANSWR  | YSSAF-       | 108 |
| D_melanogaster | GPKFREYVKSAPRNYSMIVMLTALAPSRCQIC | RHAHDEF          | FAIVANSY     | 112 |
| C_elegans      | MDKWKTLVRMQPRNYSMIVMFTALSPGVC    | CPICKPAYDEF      | MIVANSHRYTSS | 103 |

\*:: :: \*\*\*\*\*::\*\*:: \*:: \*:: \*:: \*::

**Thioredoxin**

|                |                          |                 |            |         |     |
|----------------|--------------------------|-----------------|------------|---------|-----|
| H_sapiens      | FAMVDFDEGSDVFQMLNMNSAPT  | FINFPAK-GKPKRGD | TYELQVRGFS | SAEQI   | 174 |
| P_troglodytes  | FAMVDFDEGSDVFQMLNMNSAPT  | FINFPAK-GKPKRGD | TYELQVRGFS |         | 174 |
| M_musculus     | FAMVDFDEGSDVFQMLNMNSAPT  | FINFPPK-GKPKRAD | TYELQVRGFS | AEQ     | 174 |
| R_norvegicus   | FAMVDFDEGSDVFQMLNMNSAPT  | FINFPPK-GKPKRAD | TYELQVRGFS | A       | 174 |
| C_familiaris   | FAMVDFDEGSDVFQMLNMNSAPT  | FINFPAK-GKPKRGD | TYELQVRGFS | A       | 174 |
| B_taurus       | FAMVDFDEGSDVFQMLNMNSAPT  | FINFPAK-GKPKRGD | TYELQVRGFS | AEQIA   | 174 |
| G_gallus       | FAMVDFDEGSDVFQMLNMNSAPT  | FINFPAK-GKPKRGD | TYELQVRGF  | AAEQLA  | 167 |
| X_laevis       | FAVDFDEGSDVFQMLNMNSAPT   | FINFPPK-GKPKKGD | TYELQVRGF  | AAEQLA  | 168 |
| D_rerio        | FAMVDFDEGSDVFQMLNMNSAPT  | FINFPAK-GKPKRAD | TYELQVRGF  | AAEQLAR | 167 |
| D_melanogaster | FAMVDFDDGSEVFQLLRNLNTAPV | FMHFPAK-GKPKGAD | TMDIHRVGF  |         | 171 |
| C_elegans      | FGIVDYEDAPQIFQOMNLNTAPIL | YHFGPKLGAKKRPE  | QMDFORQGF  | DADAI   | 163 |

\*.\*\*\*\*\*. :\*\*\* :.\*\*\* : . \* \* \*

**Transmembrane Helix 1**

**Transmembrane Helix 2**

|                |                                  |                |            |     |
|----------------|----------------------------------|----------------|------------|-----|
| H_sapiens      | DVNIRVIRPPNYAGPLMLGLLLAVIGGLVYL  | RRSNMEFLFNKTGW | AFAALCF    | 234 |
| P_troglodytes  | DVNIRVIRPPNYAGPLMLGLLLAVIGGLVYL  | RRSNMEFLFNKTGW | AFA        | 234 |
| M_musculus     | DVNIRVIRPPNYAGPLMLGLLLAVIGGLVYL  | RRSNMEFLFNKTGW | AFAALC     | 234 |
| R_norvegicus   | DVNIRVIRPPNYAGPLMLGLLLAVIGGLVYL  | RRSNMEFLFNKTGW | AFAA       | 234 |
| C_familiaris   | DVNIRVIRPPNYAGPLMLGLLLAVIGGLVYL  | RRSSMEFLFNKTGW | AFAA       | 234 |
| B_taurus       | DVNIRVIRPPNYAGPLMLGLLLAVIGGLVYL  | RRSNMEFLFNKTGW | AFAALCFV   | 234 |
| G_gallus       | DVNIRVIRPPNYAGPLMLGLLLAVIGGLVYL  | RGSNLDFLYNKTGW | AFAALCFV   | 227 |
| X_laevis       | DVNIRVIRPPNYAGPLMLGLLLAVIGGLVYL  | RRSNLDFLNNKTGW | ALAALCFV   | 228 |
| D_rerio        | DVHIRVIRPPNYAGPLMLGLLAFIGSLAYL   | RRNNLEFLFNKNV  | WAFSALCFVL | 227 |
| D_melanogaster | DITIRIFRPPNYSGTVAMITLVALVGSFLYI  | RRNNLEFLYNKNL  | WGAWA      | 231 |
| C_elegans      | EVHVRVIRPPNYTAPVVIALLFVALLGMLYMK | RNSLDLFLFNRTV  | WGFVCLAI   | 223 |

:: \*::\*\*\*\*\*. : : :\*\*\*. : \*:: :.\*\*\* \*.. \*.. : : : \*::

|                | Transmembrane Helix 2                                | Transmembrane Helix 3    |     |
|----------------|------------------------------------------------------|--------------------------|-----|
| H_sapiens      | MWNHIRGPPYAHKNPHTGHVNYIHGSSQAQ                       | FVAETHIVLLFNGGVTLGMVLL   | 294 |
| P_troglodytes  | MWNHIRGPPYAHKNPHTGHVNYIHGSSQAQ                       | FVAETHIVLLFNGGVTLG       | 294 |
| M_musculus     | MWNHIRGPPYAHKNPHTGHVNYIHGSSQAQ                       | FVAETHIVLLFNGGVTLGMVL    | 294 |
| R_norvegicus   | MWNHIRGPPYAHKNPHTGHVNYIHGSSQAQ                       | FVAETHIVLLFNGGVTLGM      | 294 |
| C_familiaris   | MWNHIRGPPYAHKNPHTGHVNYIHGSSQAQ                       | FVAETHIVLLFNGGVTLGM      | 294 |
| B_taurus       | MWNHIRGPPYAHKNPHTGHVNYIHGSSQAQ                       | FVAETHIVLLFNGGVTLGMVLLC  | 294 |
| G_gallus       | MWNHIRGPPYAHKNPHTGQVNYIHGSSQAQ                       | FVAETHIVLLFNGGVTLGMVLLH  | 287 |
| X_laevis       | MWNHIRGPPYAHKNPHTNQVNYIHGSSQAQ                       | FVAETHIVLLFNQAVTLGMVLLH  | 288 |
| D_rerio        | MWNHIRGPPYAHKNPNTGQVSYIHGSSQAQ                       | FVAETHIVLLFNAAVTIGMVLLHE | 287 |
| D_melanogaster | MWNHIRGPPPLVHKSQ-NGGVAYIHGSSQGLVVETIIVMFLNAMIVL      |                          | 290 |
| C_elegans      | MWNHIRGPPFMITNPNTKEPSFIHGSTQFQLIAETIIVGLLYALIAIGFICV |                          | 283 |
|                | ***** .. . :****:* *:::**:** :: . :::*: : *::        |                          |     |

|                | Transmembrane Helix 4  |                                 |             |
|----------------|------------------------|---------------------------------|-------------|
| H_sapiens      | DIG-----               | KRKIMCVAGIGLVVLFSSWMLSIF        | RSKYHGYPY   |
| P_troglodytes  | DIG-----               | KRKIMCVAGIGLVVLFSSWMLSIF        | RSKYH       |
| M_musculus     | DIG-----               | KRRMMCIAGIGLVVLFSSWMLSIF        | RSKYHGYP    |
| R_norvegicus   | DIG-----               | KRRMMCIAGIGLVVLFSSWMLSIF        | RSKYHG      |
| C_familiaris   | DIG-----               | KRKIMCVAGIALVVLFSSWMLSIF        | RSKYHG      |
| B_taurus       | DIG-----               | KRKIMCVAGIGLVVLFSSWMLSIF        | RSKYHGYPYS  |
| G_gallus       | DVG-----               | KRKIMCIAGIGLVVFFSWLLSVF         | RSKYHGYPYS  |
| X_laevis       | DVG-----               | KRKIMCIAGITLVVIFSWLLSVF         | RSKYHGYPYS  |
| D_rerio        | DIV-----               | KRKIMCVAGIGLVVLFSSWLLSVF        | RAKYHGYPYSF |
| D_melanogaster | -HN-----               | KNRIMAMTGLVLLTVFFSFLSVF         | RSKA        |
| C_elegans      | SKDRKNAGKKNLPLSLLNIPTN | TLAIAGLVCICVFFSFLSVF            | RSKYRGYPY   |
|                |                        | . :::*: : .****:**:** * :*****: |             |

**Figure S1A & S1B. Comparison of MAGT1 amino acid sequences in animals of varying complexity or relative evolutionary distance from *H. sapiens*.**

The aligned amino acid sequences of MAGT1 homologs are shown, with the regions corresponding to the signal peptide (blue box), TRX domain (green box) containing the CxxC (purple box) and *cis*-proline (orange box) motifs, and four transmembrane helices (red boxes) indicated.

|       |                                                              |                              |                              |                 |
|-------|--------------------------------------------------------------|------------------------------|------------------------------|-----------------|
|       | <b>Signal peptide</b>                                        |                              | <b>Thioredoxin</b>           |                 |
| MagT1 | MAARWRFWCVSVTMVALLIVCDVPSASA                                 | QRKKEMVLSEKVSQ               | LMEWTNKR--VI                 | 58              |
| Ost3  | -----MNWLFVSLVFFCGVSTHPALA                                   | -----MS--SNR                 | LLKLANKSPKKIIP               | 44              |
| Ost6  | -----MKWCSTYII IWLAIIFHKFQKSTA                               | -----TASHNIDD                | LILQLKDDTGVI TVTA            | 49              |
|       | .    ::    :::    . . . *                                    |                              | :    ..                      |                 |
|       |                                                              | <b>Thioredoxin</b>           |                              |                 |
| MagT1 | DKFRRLVKAPPRNYSVIVMFTALQLHRQCVVCKQADEEFQILANSWR-----YSSAFTN  |                              |                              | 112             |
| Ost3  | SSFENILAPPHENAYIVALFTATAPEIGCSLCELESEYDTIVASWFDDHPDAKSSNSDT  |                              |                              | 104             |
| Ost6  | YPLLSRGVPGYFNILYITMRGTNSNGMSCQLCHDFEKTYHAVADVIR-----SQAPQS   |                              |                              | 102             |
|       | :                                                            | .                            |                              |                 |
|       |                                                              | <b>Thioredoxin</b>           |                              |                 |
| MagT1 | RIFFAMVDFDEGS----DVFQMLNMNSAPTFINFPKAGKPKRGD-----TYELQVRGF   |                              |                              | 161             |
| Ost3  | SIFFTKVNLEDPSTIPKAFQFFQLNNVPRLFIFKPNSPSILDHSVI----SISTDTGSE  |                              |                              | 160             |
| Ost6  | LNLFFTVDVNEVP----QLVKDLKLQNVPHLVVYPPAESNKQSQFEWKTSPFYQYSLVPE |                              |                              | 158             |
|       | :*    *: : : .                                               |                              |                              |                 |
|       | <b>Thioredoxin</b>                                           | <b>Transmembrane Helix 1</b> | <b>Transmembrane Helix 2</b> |                 |
| MagT1 | SAEQIARWIADRTDVNIRVIRPPNYAGP-LMLGLLLAVIGGLVYLRRSNMEFLFN--    |                              |                              | 218             |
| Ost3  | RMKQIIQAIKQFSQVND FSLHLPMDWTP-IITSTIITFITVLLFKKQSKLMFSIISR   |                              |                              | 219             |
| Ost6  | NAENTLQFGDFLAKILNISITVPOAFNVQEFVYFVACMVVFIKVKVILPKVTNKWK     |                              |                              | 218             |
|       | ::    :                                                      | : : :    :                   | *    :                       | :    : : :    : |
|       |                                                              | <b>Transmembrane Helix 2</b> | <b>Transmembrane Helix 3</b> |                 |
| MagT1 | WAFALCFVLAMTSGQMNHNIRGPPYAHKNPHTGHVNYIHGSSQAQFVAETHIVLLF     |                              |                              | 278             |
| Ost3  | WATLSTFFIICMISAYMNFNQIRNTQLAGVGPKEVYFLPNEFQHOFAIETQVMVLIY    |                              |                              | 279             |
| Ost6  | SMILSLGILLPSITGYKFEVEMNAIPFIARDAKNRIMYFSGGS-GWQFGIEIFSVSLMY  |                              |                              | 277             |
|       | :    : : :    : . . .                                        | . . .    : :    . .          | * *    *    : * :            |                 |
|       | <b>Transmembrane Helix 3</b>                                 | <b>Transmembrane Helix 4</b> |                              |                 |
| MagT1 | VTLGMVLLCEAAT---SDMDIGKRKIMCVAGIG-----LVVLFVSWMLSIFRSKYH     |                              |                              | 329             |
| Ost3  | LALVVLVVKGIQFLRSHLYPETKKAYFIDAILASFCALFIYVFFAALTTVFTIKSPA    |                              |                              | 339             |
| Ost6  | MSALSVLLIYVPKISCVSEKMRGLLSSFLACVL-----FYFFSYFISCYLIKNP       |                              |                              | 329             |
|       | : :    * : *                                                 | :    :                       | * : : : :    * . * *         |                 |
| MagT1 | YSFLMS-----                                                  | 335                          |                              |                 |
| Ost3  | FPLLRLSAPFK                                                  | 350                          |                              |                 |
| Ost6  | IVF-----                                                     | 332                          |                              |                 |

**Figure S2.** Comparison of the amino acid sequences MAGT1, *S. cerevisiae* OST3 and OST6. Conserve functional regions of the indicated proteins using the same color scheme as shown in Supplemental Figure 1.

|                       |                               |
|-----------------------|-------------------------------|
| <u>C</u> V <u>V</u> C | MAGT1                         |
| <u>C</u> S <u>V</u> C | TUSC3                         |
| <u>C</u> S <u>L</u> C | OST3 ( <i>S. cerevisiae</i> ) |
| <u>C</u> Q <u>L</u> C | OST6 ( <i>S. cerevisiae</i> ) |
| <u>C</u> G <u>P</u> C | Thioredoxin 1/2               |
| <u>C</u> G <u>H</u> C | Protein Disulfide Isomerase   |

**Figure S3. The CxxC motif of OST3/OST6 and MAGT1/TUSC3 are atypical of highly active TRX domains.**

The motif is shown in single letter amino acid code for the indicated proteins.

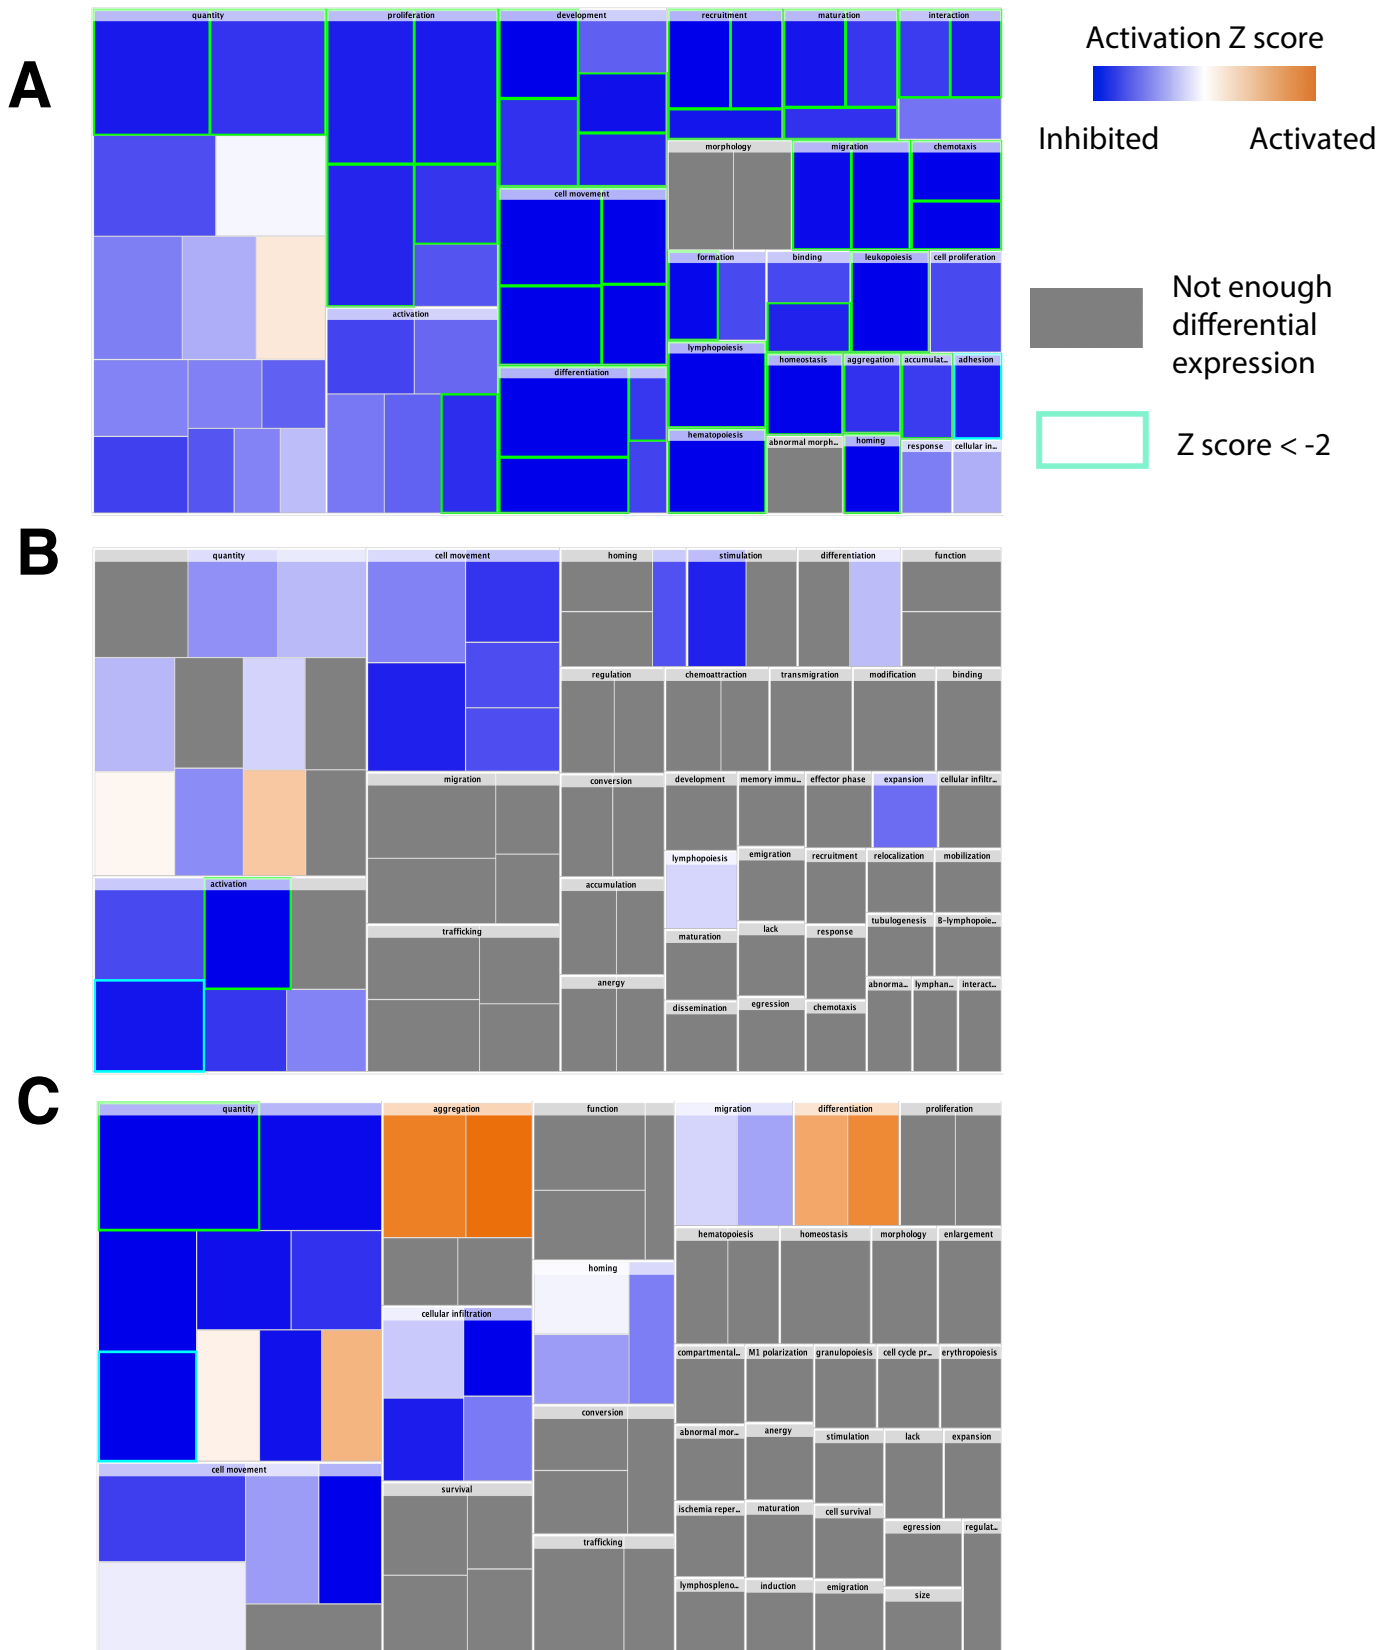

**Figure S4. Treemap heatmap of hematological system development and function in XMEN patients. (A-C).** Treemap representation from IPA of predicted activation (orange) or inhibition (blue) of various functions within hematological system based on DEGs at (A) day 0, (B) day 3, and (C) day 12. The treemaps are divided hierarchically into categories and subcategories. Categories have labels (e.g., “quantity”) and all boxes below the label represent subcategories that belong to the labeled category.

The size of each box is proportional to  $-\log(\text{p-value})$  for the activation prediction and categories are sorted in descending order from left to right based on the sum of the area of all of the subcategories belonging to each of the categories. The key in (A; right) is used across all treemap plots. The color key with gradient from dark blue to white to dark orange represents the Z-scores for each plot, where negative values indicate predicted inhibition and positive values indicate predicted activation. Filled grey boxes indicate that not enough DEGs fall into the subcategory to predict whether the function is activated or inhibited. Blue-green highlighted borders around subcategory boxes represent functions with a Z-score  $< -2$ , which are considered significantly decreased based on the gene expression profile of the genes falling into the subcategory.

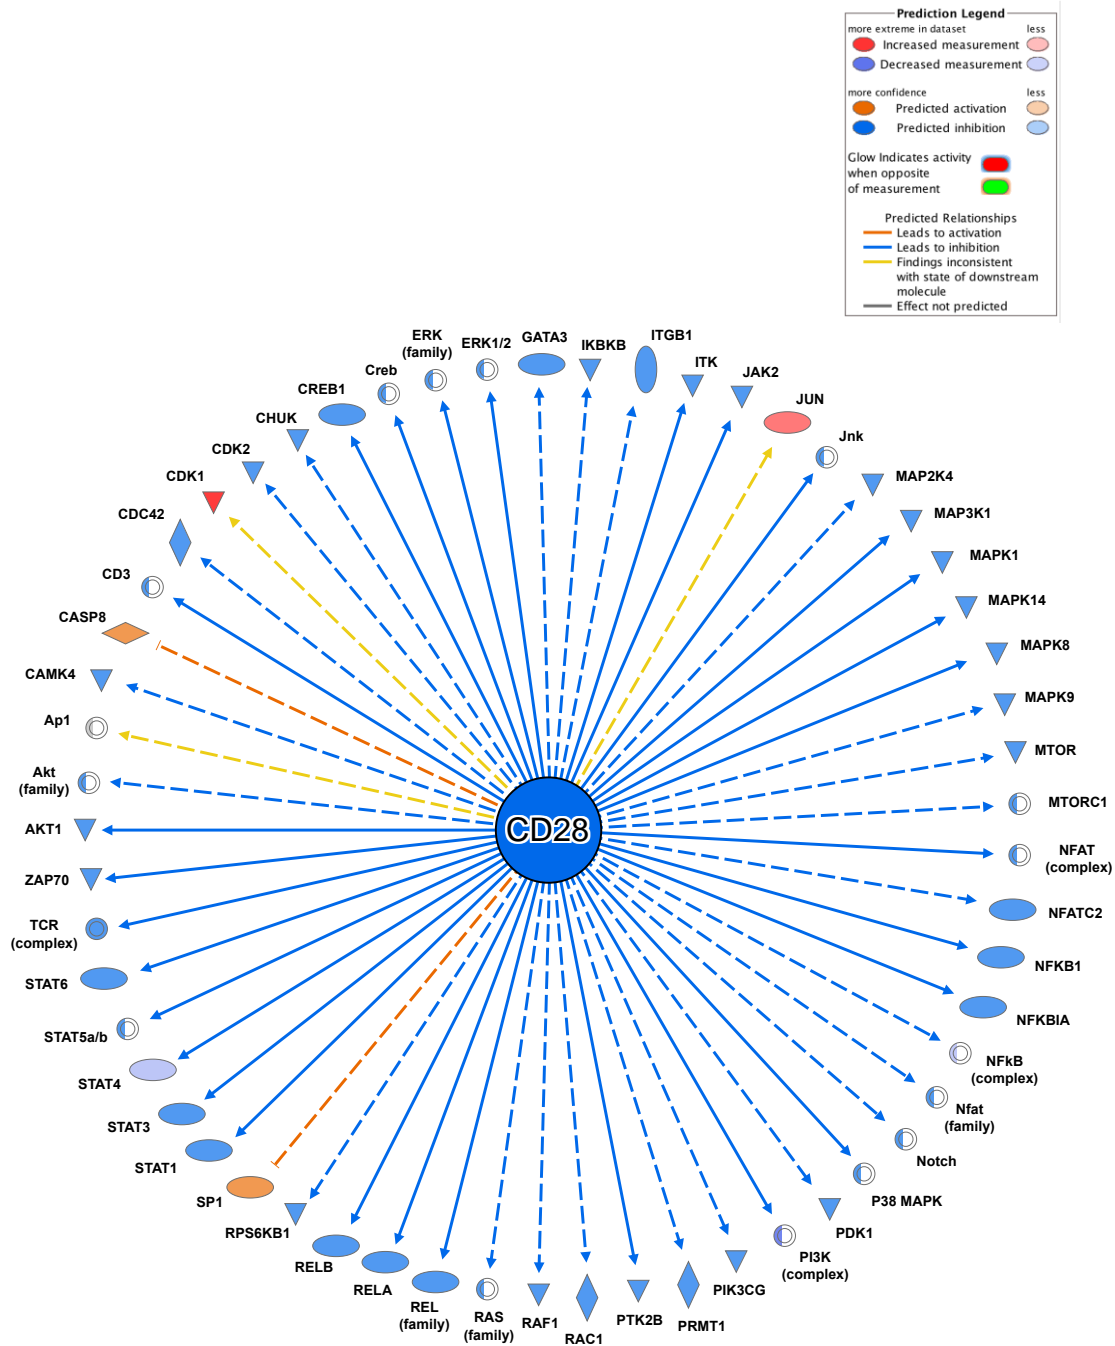

**Figure S5. CD28 causal regulatory network.**

Network of upstream regulators predicted by IPA to be inhibited (blue) or activated (orange) based on the gene expression profile of day 0 XMEN CD8<sup>+</sup> T cells compared to HC cells. Upstream of all of these regulators is the master regulator CD28, which is predicted to be inhibited (blue) based on the activation status of the downstream targets. Solid and dotted lines indicate direct and indirect interactions, respectively. Blue (inhibiting) and orange (activating) lines indicate the effect of CD28 inhibition on its targets. Yellow lines indicate a relationship where activation state of the master regulator is inconsistent with the state of the targets.



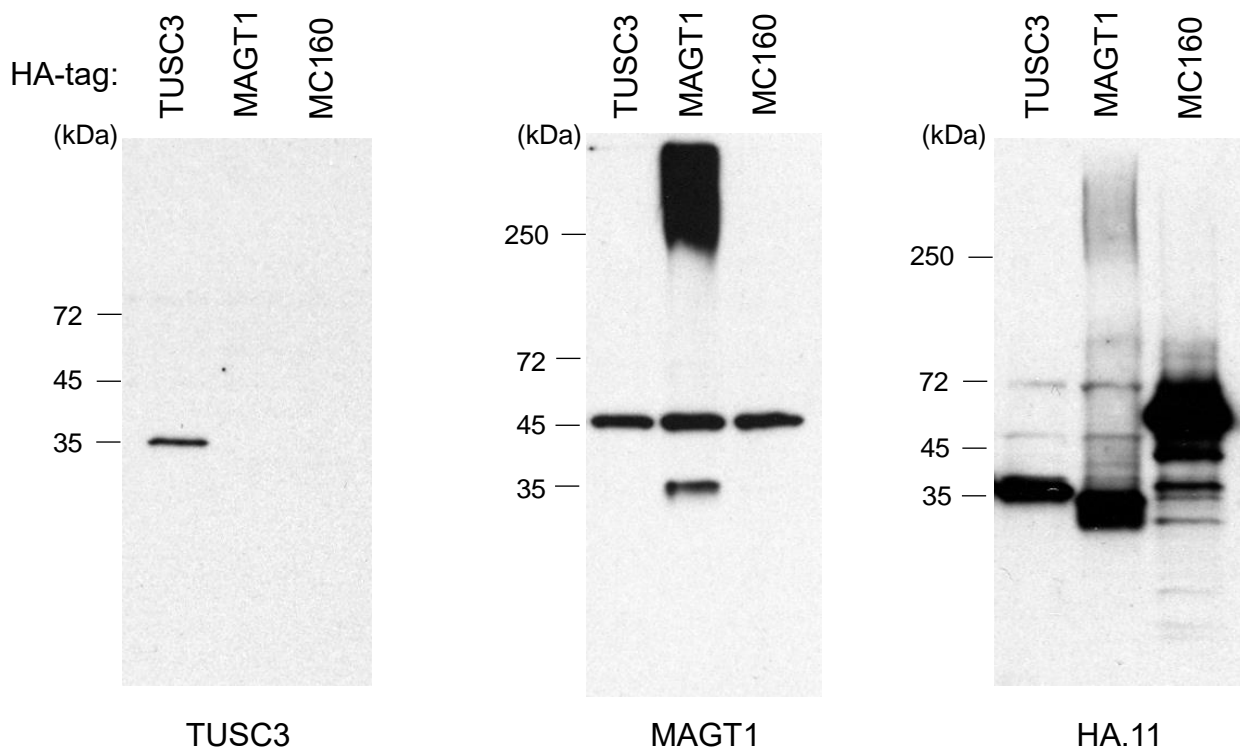

**Figure S6. Specificity of TUSC3 and MAGT1 antibodies.**

Western blots of lysates from 293T cells transfected with the indicated, HA-tagged TUSC3, MAGT1, and negative control MC160L(GFP) as indicated. Samples were probed with rabbit monoclonal antibodies. A: anti TUSC3, (clone 38-1, affinity purified); B: anti MAGT1 (clone:M17-1, 1:50 dilution); and C: mouse anti HA (HA.11).
